# Supplementary material for: Ischemia and reperfusion injury to mitochondria and cardiac function in donation after circulatory death hearts- an experimental study
Source: PubMed Central journal article supplement (PMC7769461; doi:10.1371/journal.pone.0243504), 2020-12-28

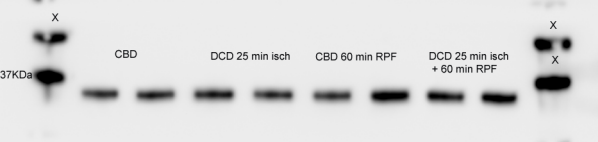

Supplement: pone.0243504.s007.pdf [file pone.0243504.s007.pdf]
